# Supplementary material for: Comparative genomics reveals extensive intra-species genetic divergence of the prevalent gut commensal Ruminococcus gnavus
Source: PubMed Central journal article supplement (PMC10438805; doi:10.1099/mgen.0.001071), 2023-07-24

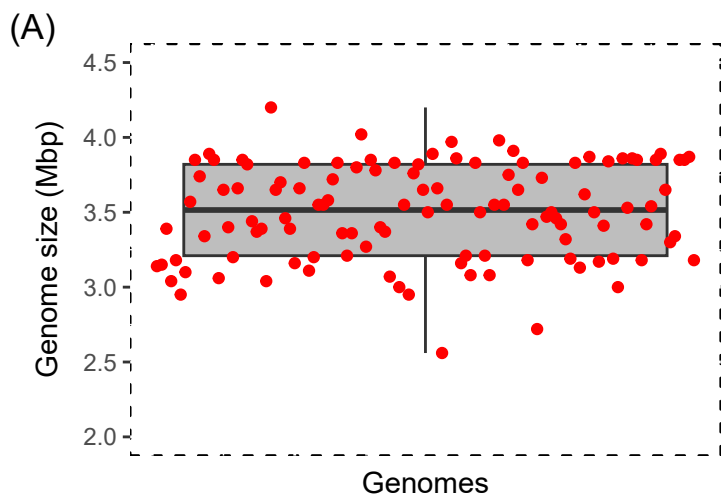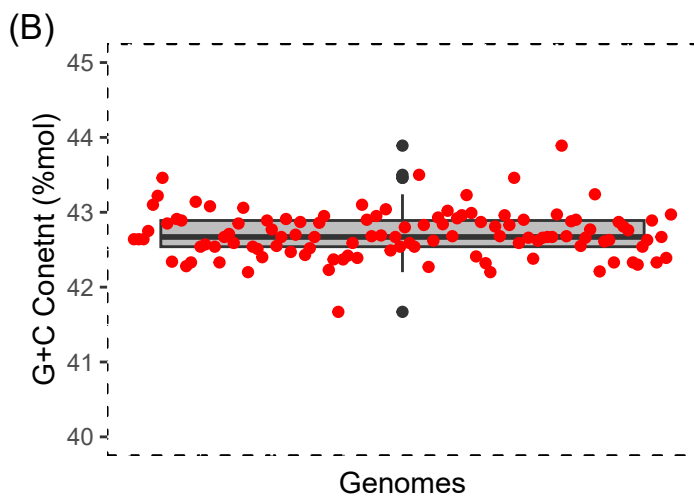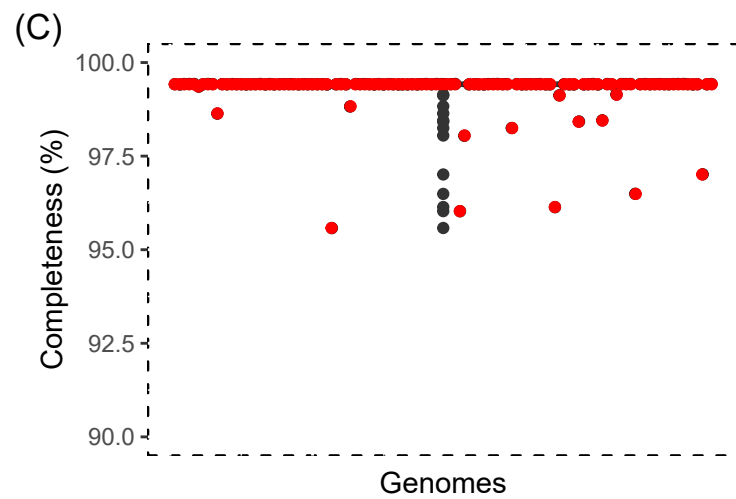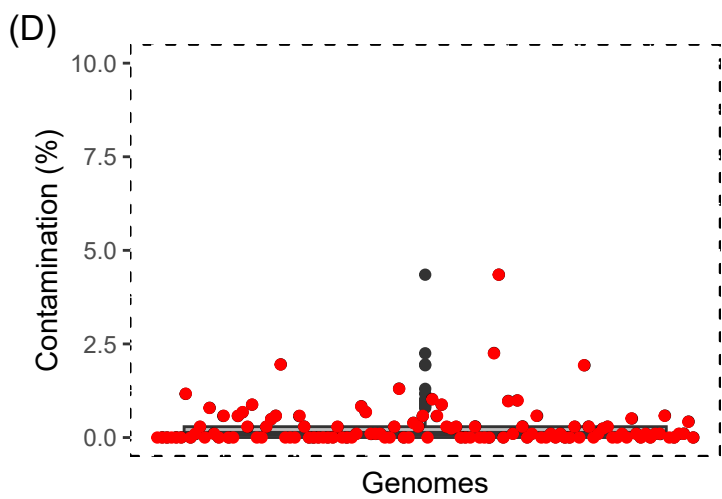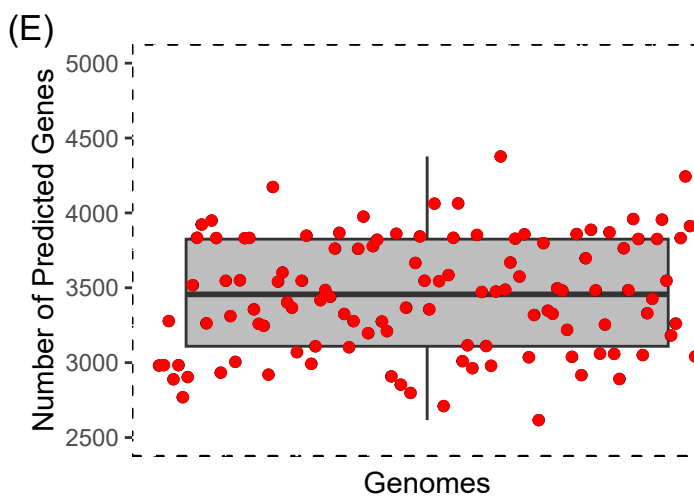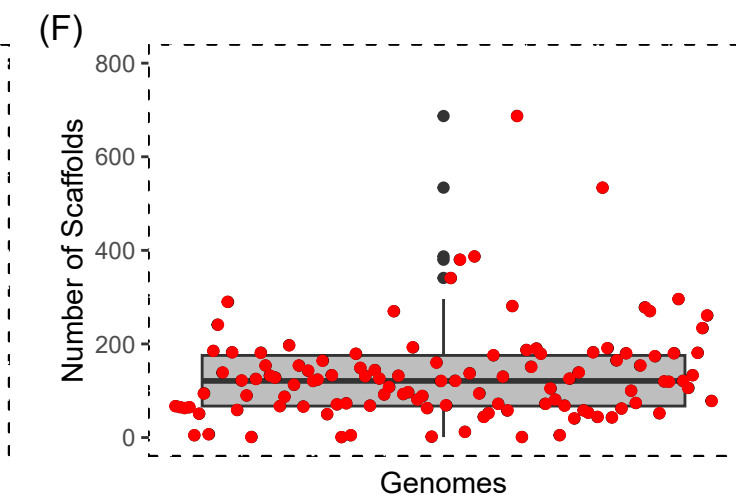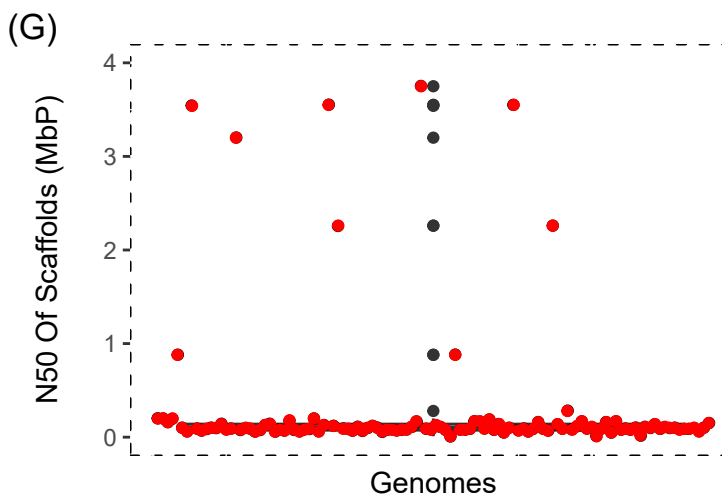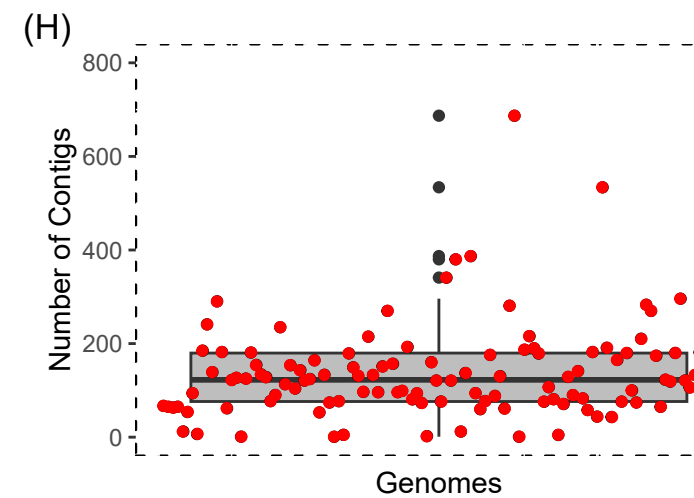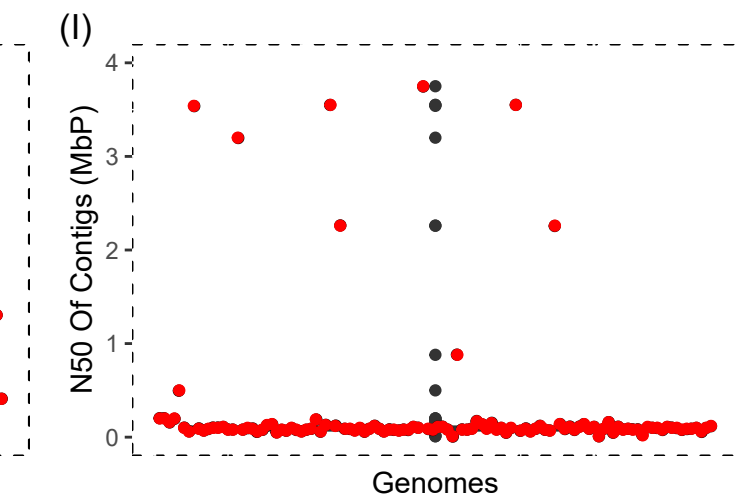

Supplement: mgen-9-1071-s001.pdf [file mgen-9-1071-s001.pdf]
